# Supplementary material for: A Glyoxalase-1 Knockdown Does Not Have Major Short Term Effects on Energy Expenditure and Atherosclerosis in Mice
Source: Hindawi journal article supplement (doi:10.1155/2016/2981639), 2015-12-15
Supplement: f1 [file 2981639.f1.pdf]

**Supplementary Table 1**

| Primer name  | Sequence                     |
|--------------|------------------------------|
| ApoE-ko-for  | 5'-GCCTAGCCGAGGGAGAGCCG-3'   |
| ApoE-ko-rev1 | 5'-TGTGACTTGGGAGCTCTGCAGC-3' |
| ApoE-ko-rev2 | 5'-GCCGCCCGACTGCATCT-3'      |
| Glo1-gd-for  | 5'-GCTTCTCCCACAAGTCTGTG-3',  |
| Glo1-gd-rev  | 5'-GGTACAGTGCAGGGGAAAGA-3'   |

Supplemental Figure 1

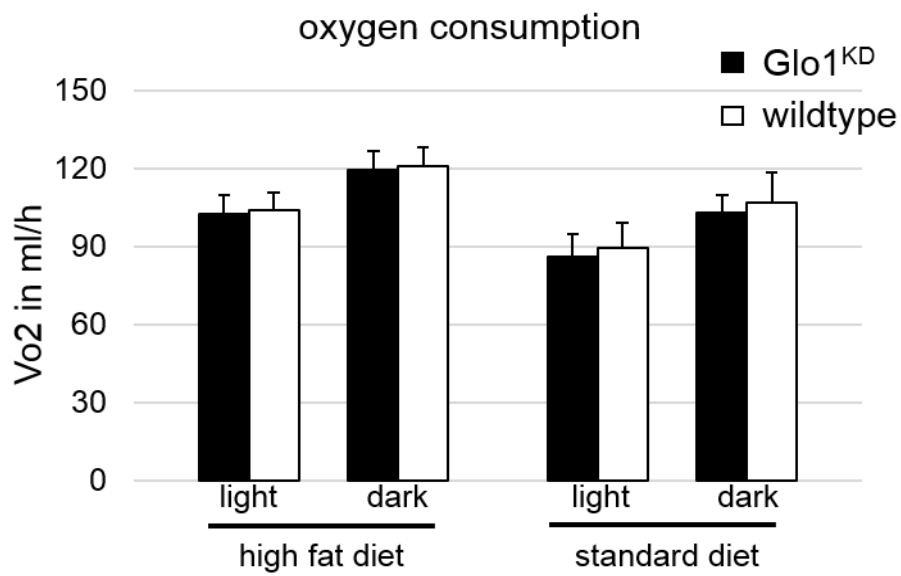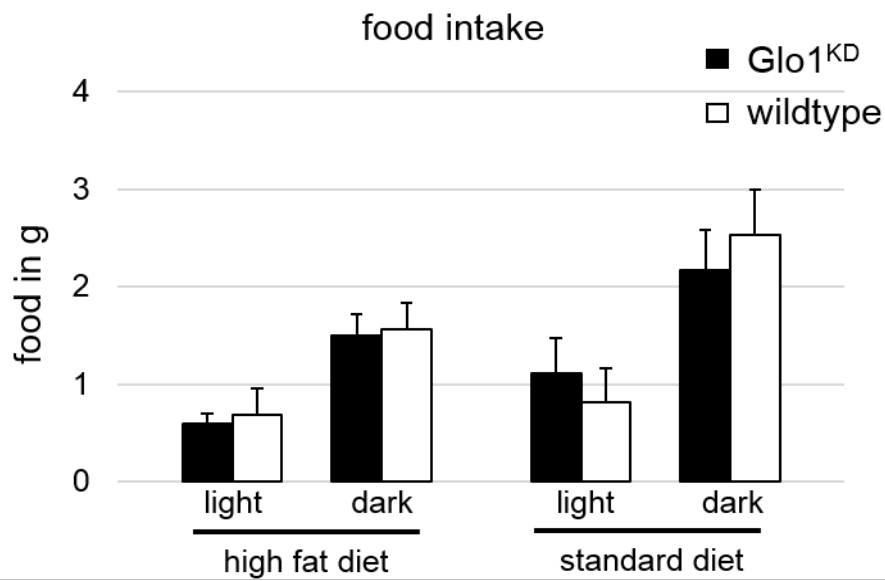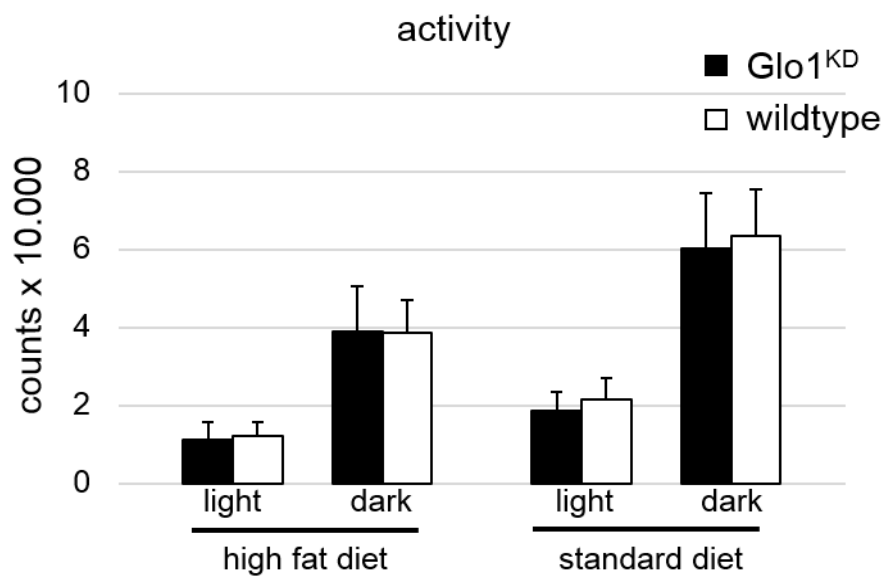

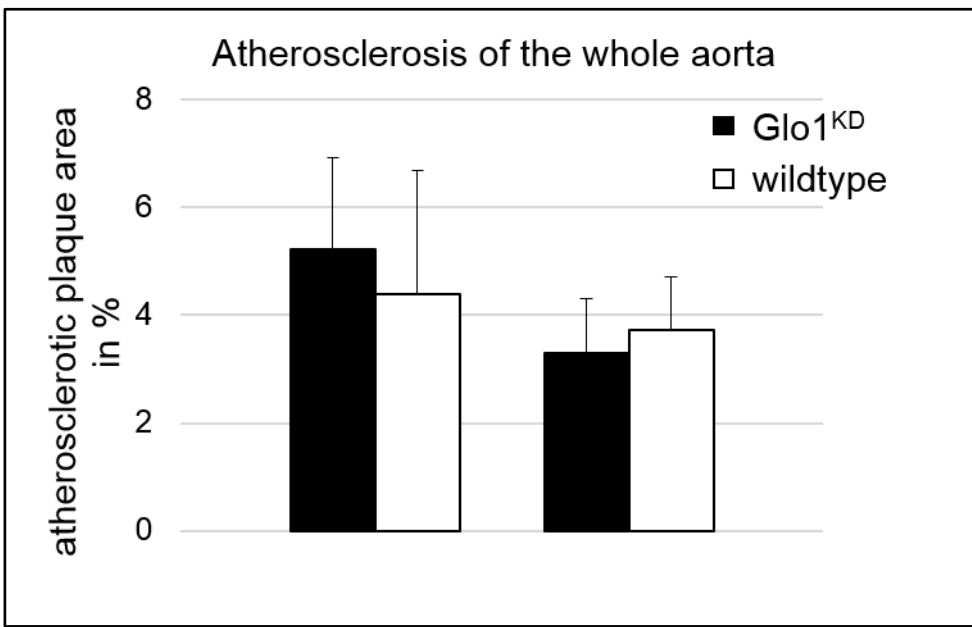

Supplemental Figure 2
